# Supplementary material for: Paired whole exome and transcriptome analyses for the Immunogenomic changes during concurrent chemoradiotherapy in esophageal squamous cell carcinoma
Source: PubMed Central journal article supplement (PMC6524245; doi:10.1186/s40425-019-0609-x), 2019-05-16

Additional file 7: Figure S1

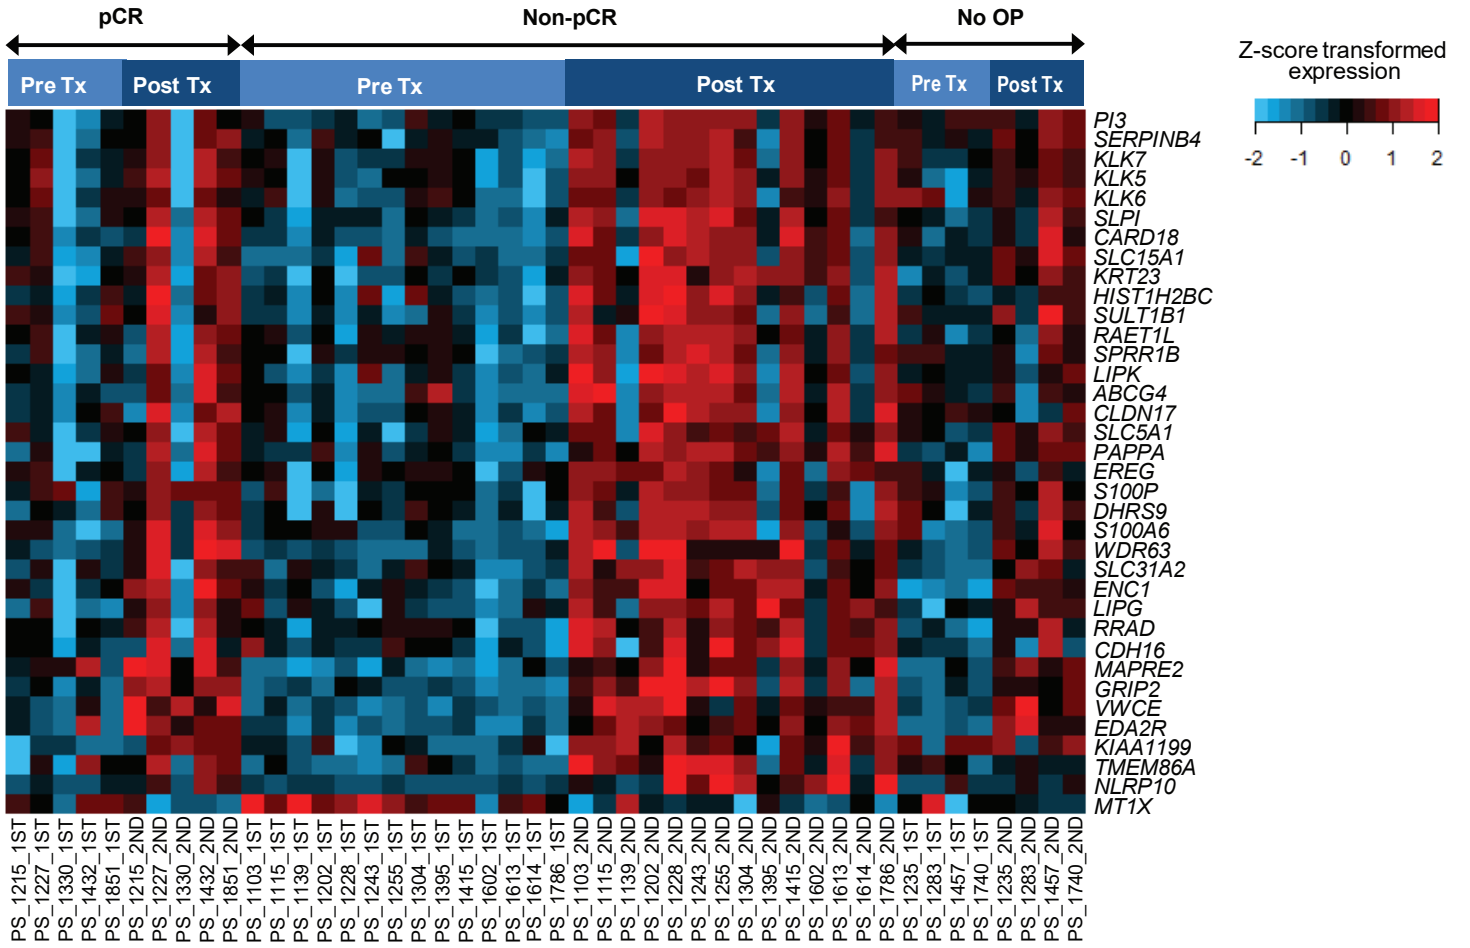

Supplement: 40425_2019_609_MOESM7_ESM.pdf [file 40425_2019_609_MOESM7_ESM.pdf]
